# Supplementary material for: Monocular metasurface camera for passive single-shot 4D imaging
Source: PubMed Central journal article supplement (PMC9950364; doi:10.1038/s41467-023-36812-6), 2023-02-23
Supplement: 41467_2023_36812_MOESM2_ESM.pdf [file 41467_2023_36812_MOESM2_ESM.pdf]

## Description of Additional Supplementary Files

**Supplementary Movie 1:** Movie of the imaging results of an outdoor dynamic scene corresponding to Figure 4 in the main text.
